# Supplementary material for: Prevalence, awareness, treatment and control of type 2 diabetes and its determinants among Mongolians in China: a cross-sectional analysis of IMAGINS 2015–2020
Source: HighWire-hosted journal article supplement (doi:10.1136/bmjopen-2022-063893), 2022-11-01

## Supplementary Materials

### Supplementary Figures: 2

**Figure S1** Awareness, treatment, and control of diabetes among Mongolian participants

by age group and by gender

**Figure S2** Odds ratios (OR) for characteristics associated with awareness, treatment,

and control of diabetes among Mongolian participants

Figure S1

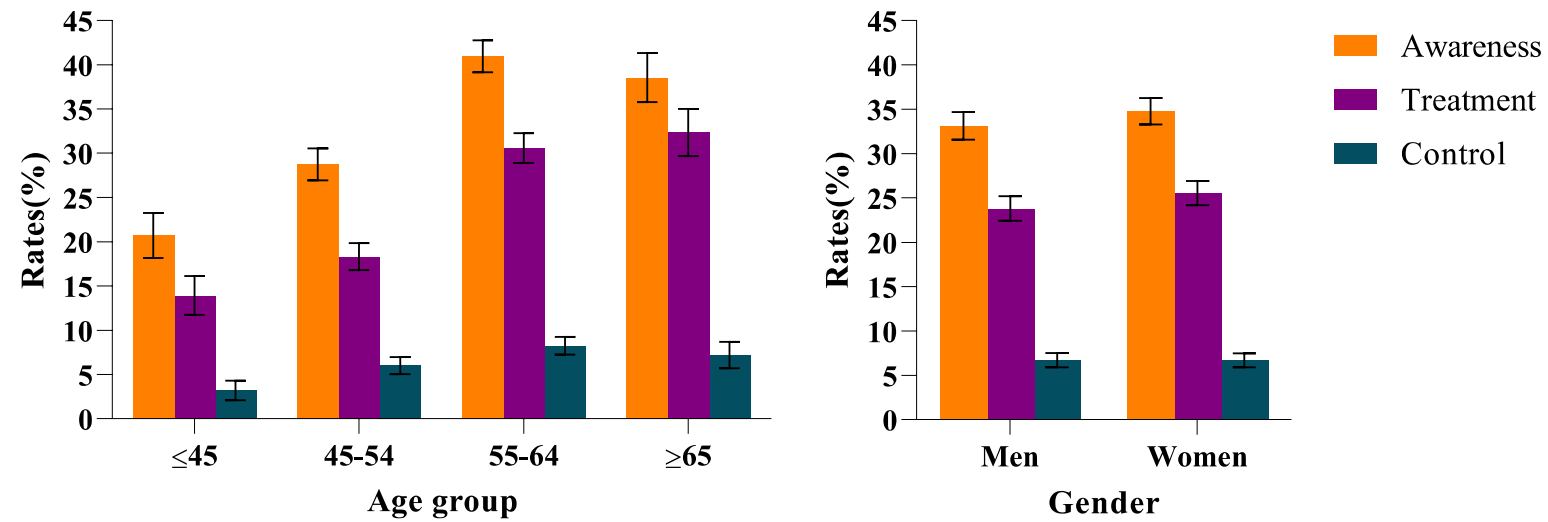

Figure S2

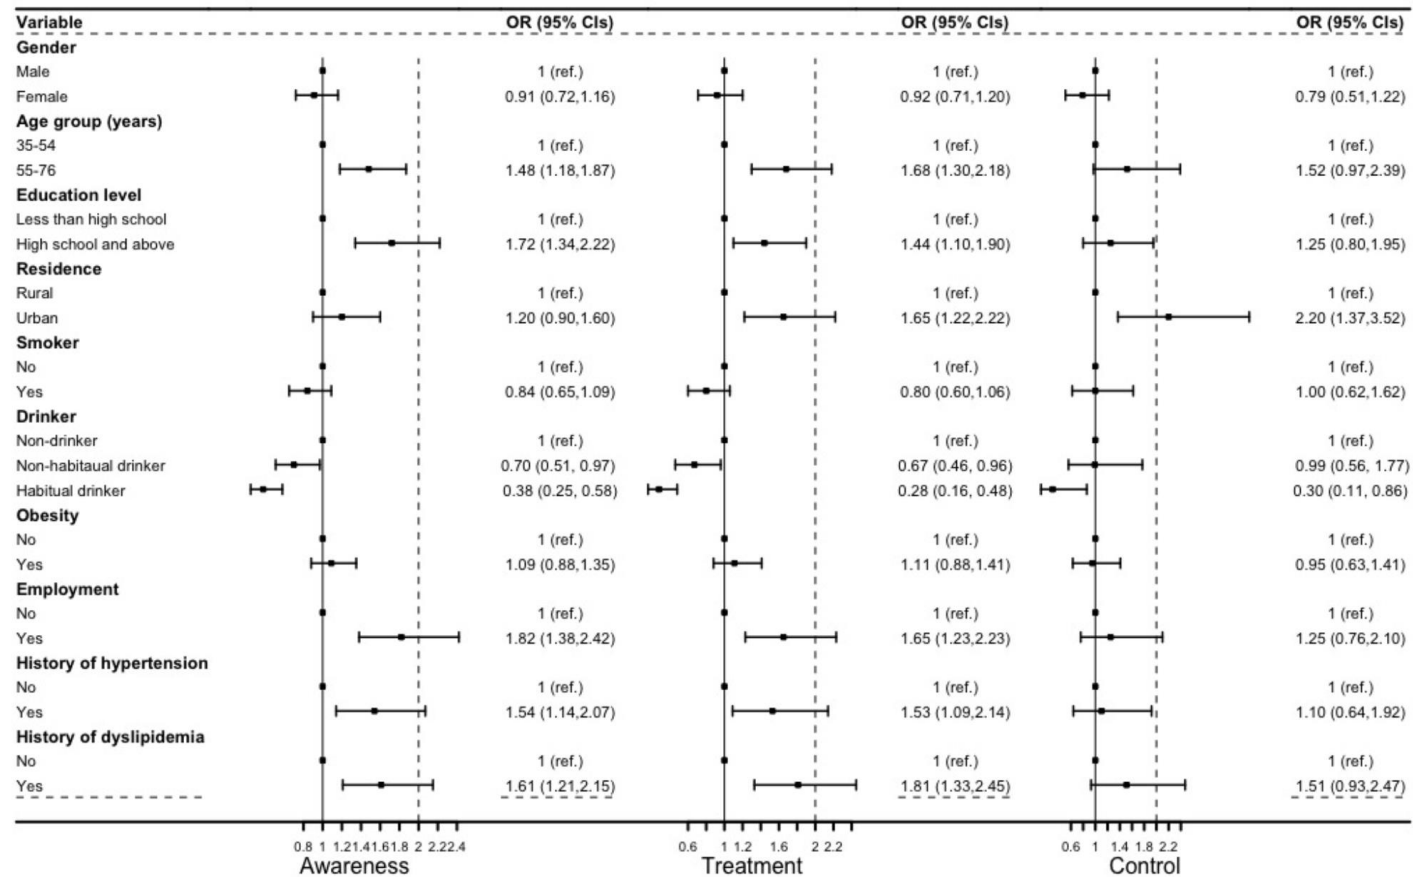

Supplement: bmjopen-2022-063893supp001_data_supplement.pdf [file bmjopen-2022-063893supp001_data_supplement.pdf]
